# Supplementary material for: Synthesis and characterization of benzoxazine-functionalized amine bridged bis(phenolate) lanthanide complexes and their application in the ring-opening polymerization of cyclic esters
Source: Royal Society of Chemistry journal article supplement (doi:10.1039/c2dt11736c), 2012-01-01
Supplement: c2dt11736c.pdf [file c2dt11736c.pdf]

### Supplementary data

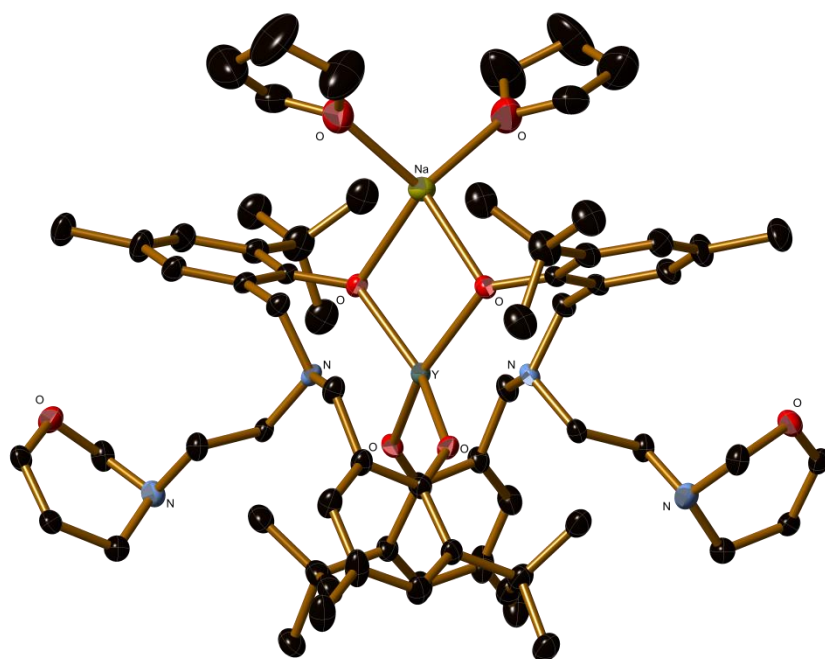

**Fig. 1** X-ray structure of **1** with thermal ellipsoids at the 30% probability level.  
Hydrogen atoms are omitted for clarity.

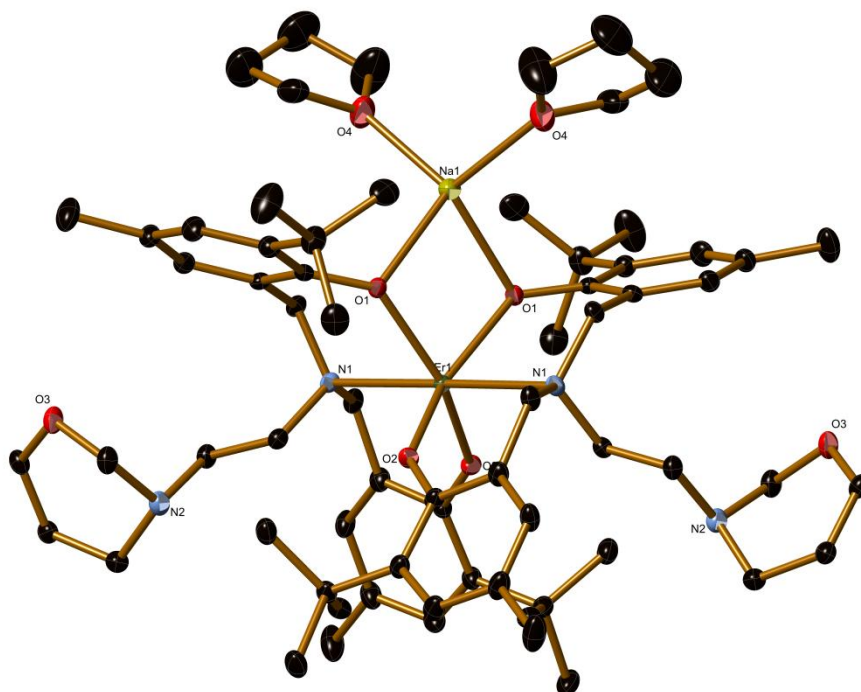

**Fig. 2** X-ray structure of **3** with thermal ellipsoids at the 50% probability level.  
Hydrogen atoms are omitted for clarity.

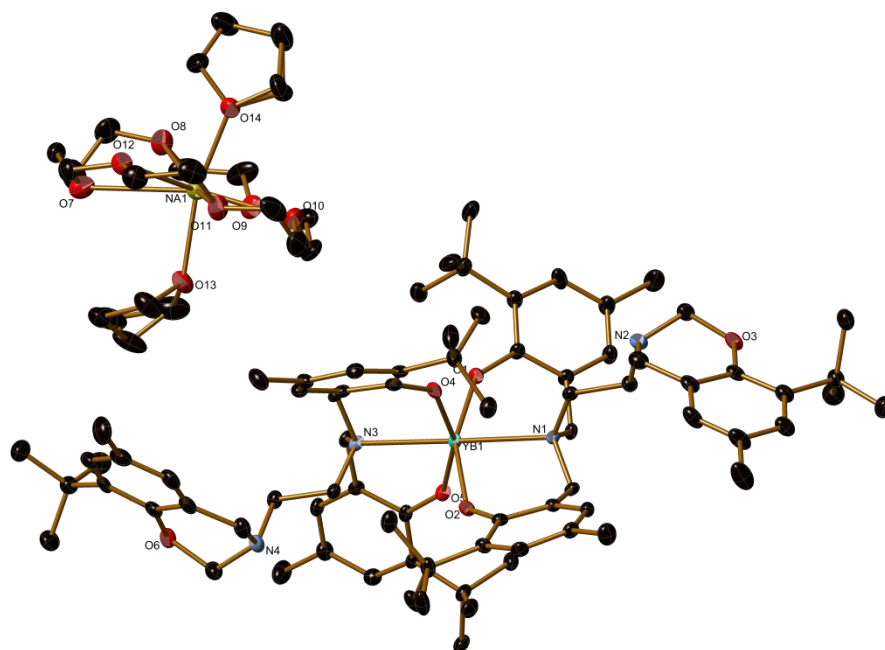

**Table 1** Polymerization of CL initiated by complexes **1** and **2**<sup>a</sup>

| entry | initiator | Temp. (°C) | solvent | [CL]/[I] <sup>b</sup> | Conversion (%) |
|-------|-----------|------------|---------|-----------------------|----------------|
| 1     | <b>1</b>  | 25         | toluene | 100                   | 0              |
| 2     | <b>1</b>  | 25         | THF     | 100                   | 0              |
| 3     | <b>2</b>  | 25         | toluene | 100                   | 45             |
| 4     | <b>2</b>  | 25         | toluene | 200                   | 33             |
| 5     | <b>2</b>  | 25         | THF     | 100                   | 0              |
| 6     | <b>2</b>  | 25         | THF     | 200                   | 0              |

<sup>a</sup> Conditions: [CL]<sub>0</sub>=1 mol/L, reaction for 24 h.

<sup>b</sup> CL/initiator molar ratio

## <sup>1</sup>H-NMR study of obtained PCLs and PLAs

PCL and PLLA obtained by these complexes were studied by <sup>1</sup>H-NMR analysis to find the end group of the polymers. As shown in Figure 4, the PCL contains a methoxy end group which appeared as a singlet at δ3.67 and hydroxy group appeared as a triplet at δ3.65 in the <sup>1</sup>H-NMR spectrum.

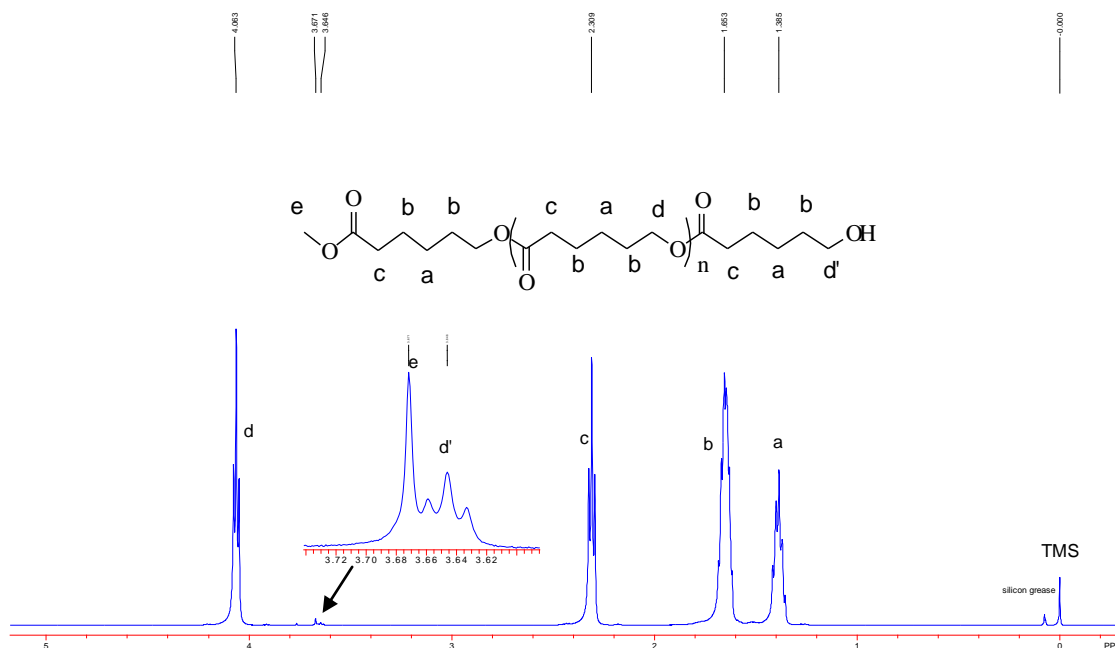

**Figure 4** Full assignment of <sup>1</sup>H-NMR spectrum of PCL initiated by complex **1** from entry 1 of **Table 3** in the main text

As shown in figure 5, the PLLA contains a methoxy end group which appeared as a singlet at  $\delta 3.76$  and hydroxy group appeared as a quartet at  $\delta 4.36$  in the  $^1\text{H}$ -NMR spectrum.

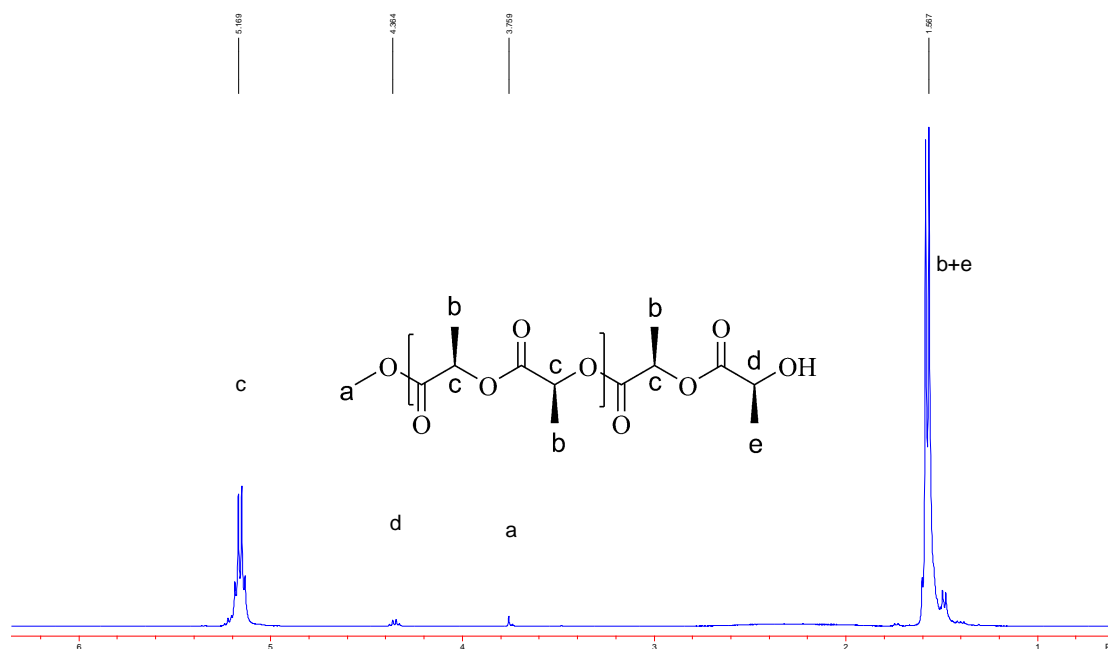

**Figure 5** Full assignment of  $^1\text{H}$ -NMR spectrum of PLA initiated by complex **1** from entry 2 of **Table 4** in the main text

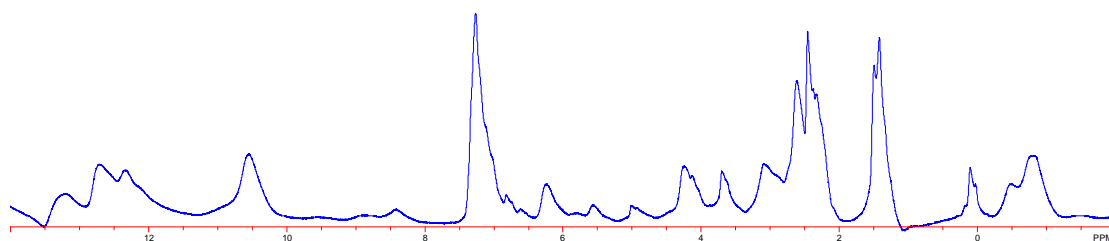

**Figure 6**  $^1\text{H}$ -NMR spectrum of  $[\text{Nd}(\text{L})_2\text{Na}(\text{THF})_2]$  (**2**)

The spectrum is unresolvable due to the strong paramagnetism of the neodymium ion.
